# Supplementary material for: Interferon-α inducible protein 6 impairs EGFR activation by CD81 and inhibits hepatitis C virus infection
Source: PubMed Central journal article supplement (PMC4355636; doi:10.1038/srep09012), 2015-03-11
Supplement: srep09012-s1.pdf [file srep09012-s1.pdf]

INTERFERON- $\alpha$  INDUCIBLE PROTEIN 6 IMPAIRS EGFR ACTIVATION BY CD81 AND  
INHIBITS HEPATITIS C VIRUS INFECTION

Keith Meyer<sup>1</sup>, Young-Chan Kwon<sup>1</sup>, Shuanghu Liu<sup>2</sup>, Curt H. Hagedorn<sup>3</sup>, Ratna B. Ray<sup>4</sup>, and  
Ranjit Ray<sup>1,5\*</sup>

Departments of Internal Medicine<sup>1</sup>and Molecular Microbiology & Immunology, Saint Louis  
University<sup>5</sup>, Department of Medicinal Chemistry, College of Pharmacy, University of Utah<sup>2</sup>,  
Central Arkansas Veterans Healthcare System and University of Arkansas for Medical  
Sciences<sup>3</sup>, and Department of Pathology, Saint Louis University<sup>4</sup>

Whole gel from  
Figure 2A

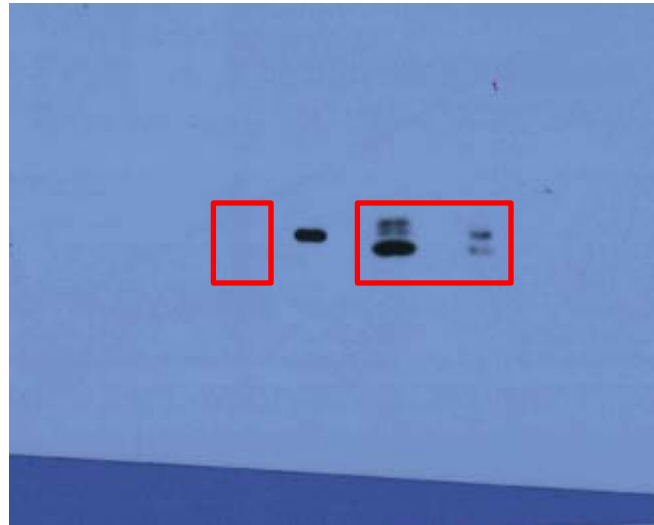

**NS3**

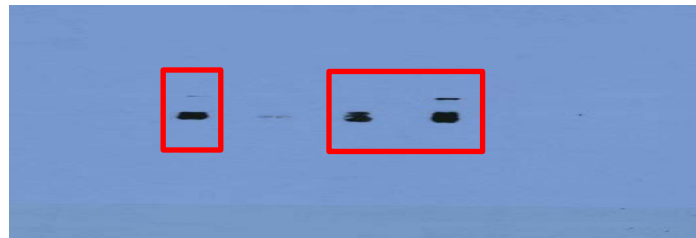

**actin**

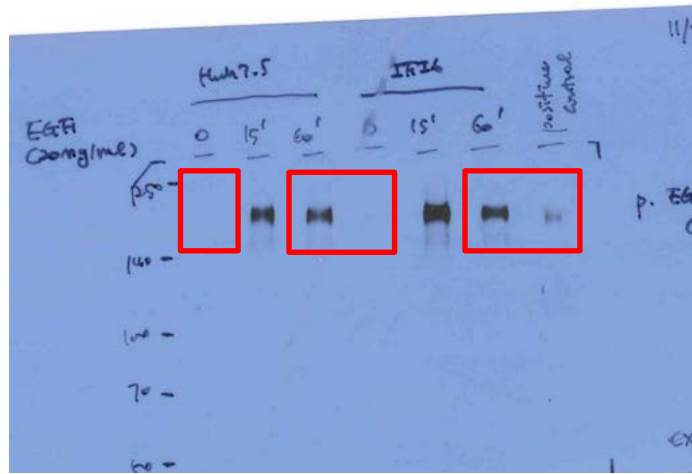

**pEGFR Y1068**

Whole gel from  
Figure 5A

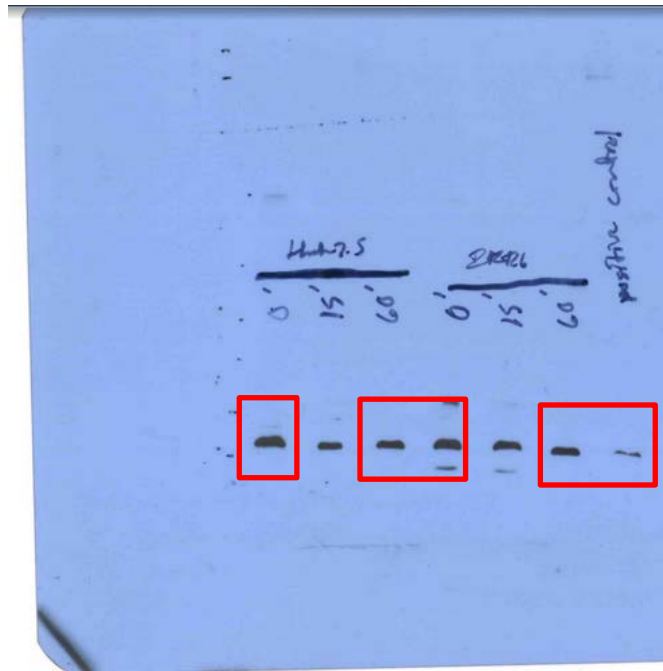

**actin**

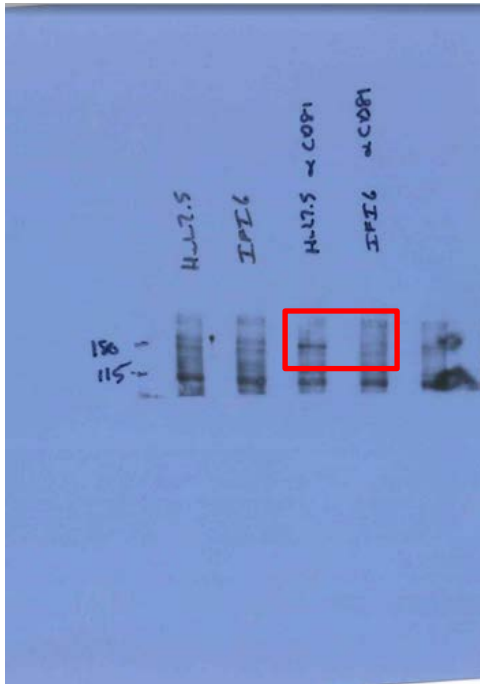

pEGFR Y1068

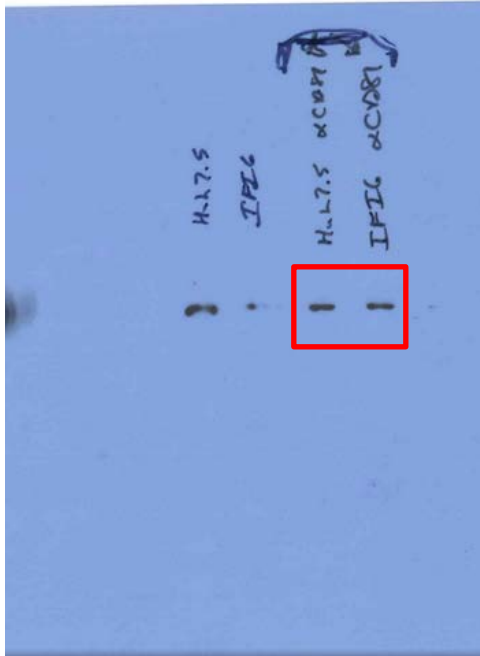

actin

Whole gel from  
Figure 5B

Whole gel from  
Figure 6A

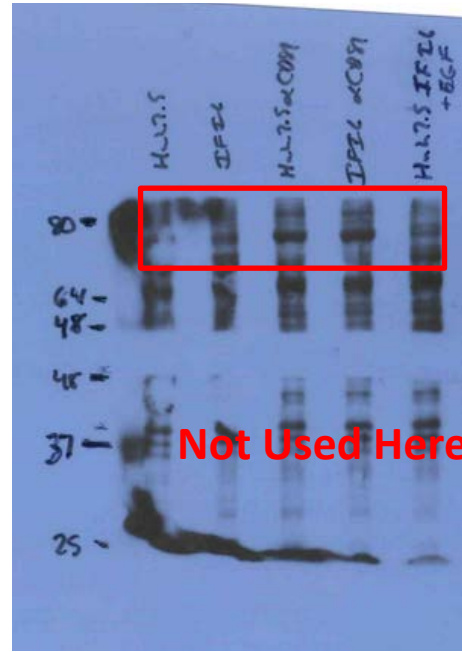

pRaf1 S259

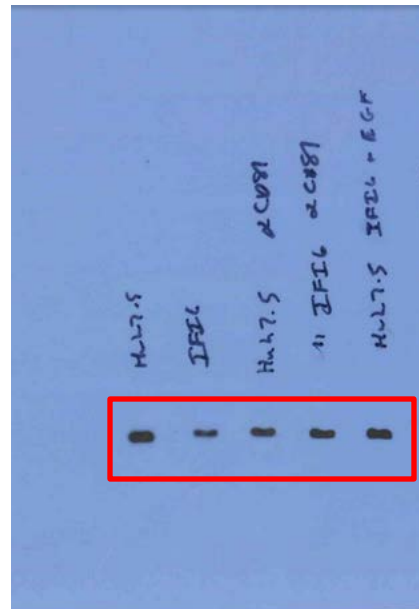

actin

Whole gel from  
Figure 6B

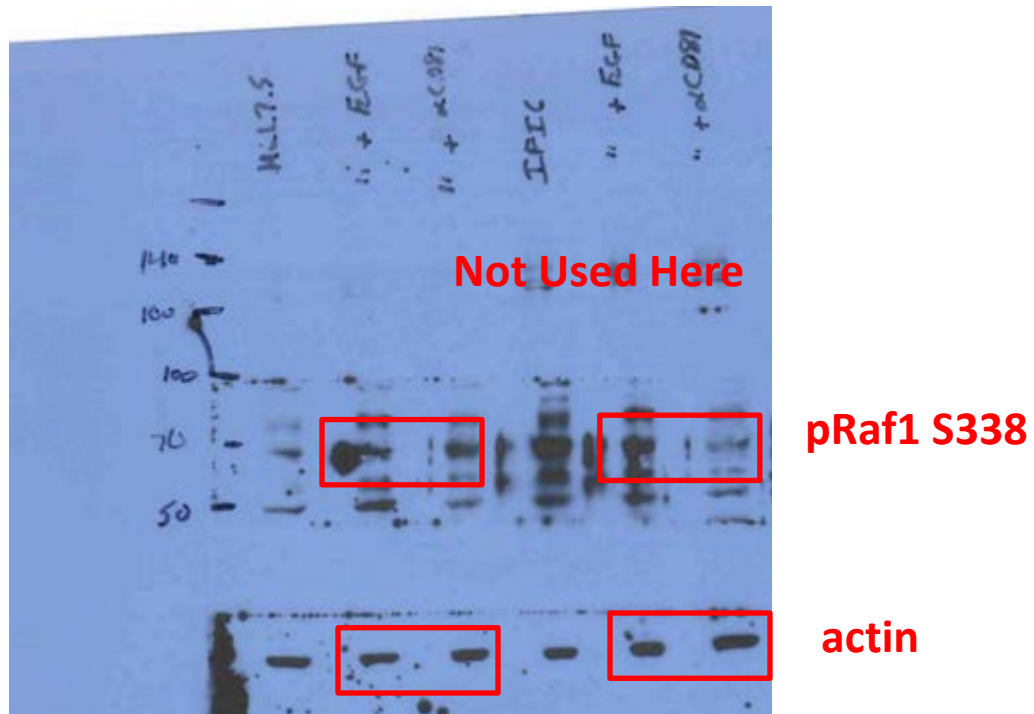

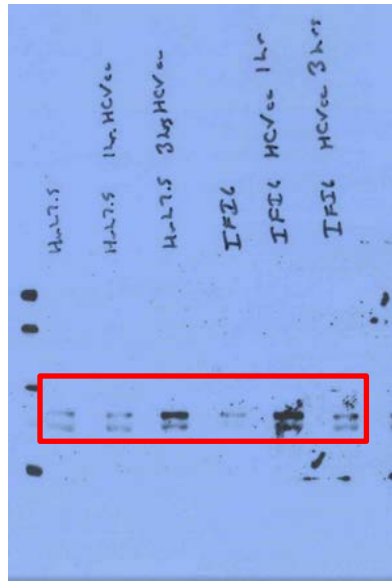

**pRaf1 (S259)**

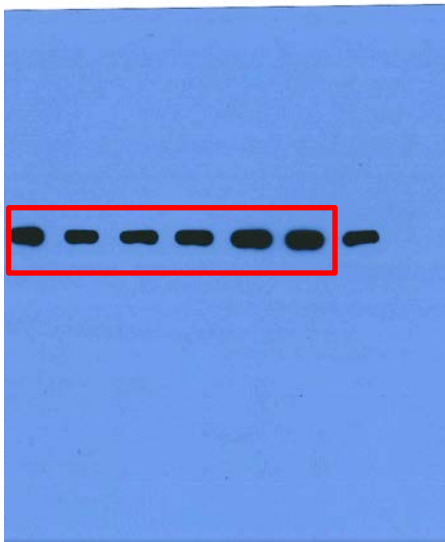

**actin**

Whole gel from  
Figure 7A

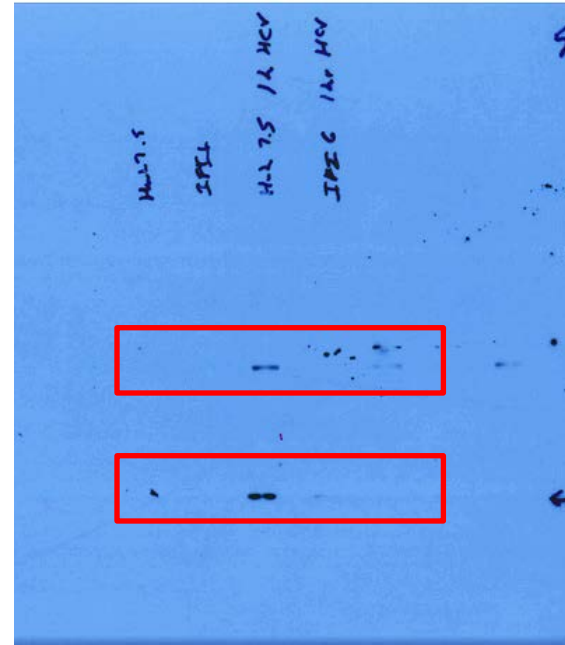

**pRaf S338**

**pERK T202/Y204**

Whole gel from  
Figure 7B

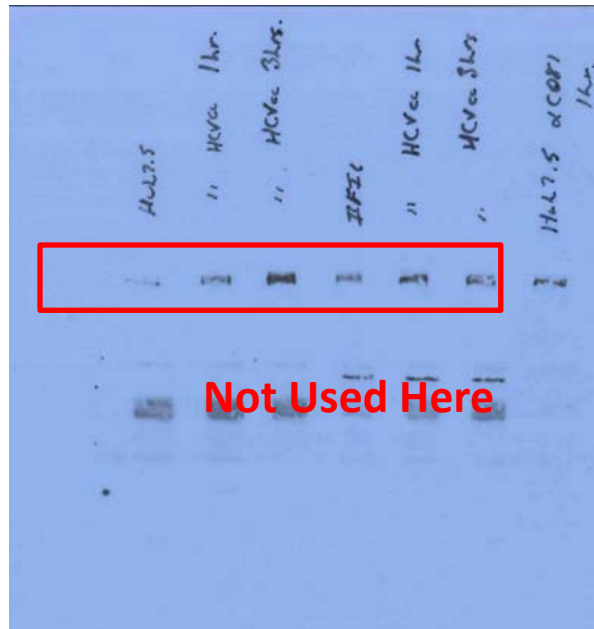

pEGFR Y1068

Not Used Here

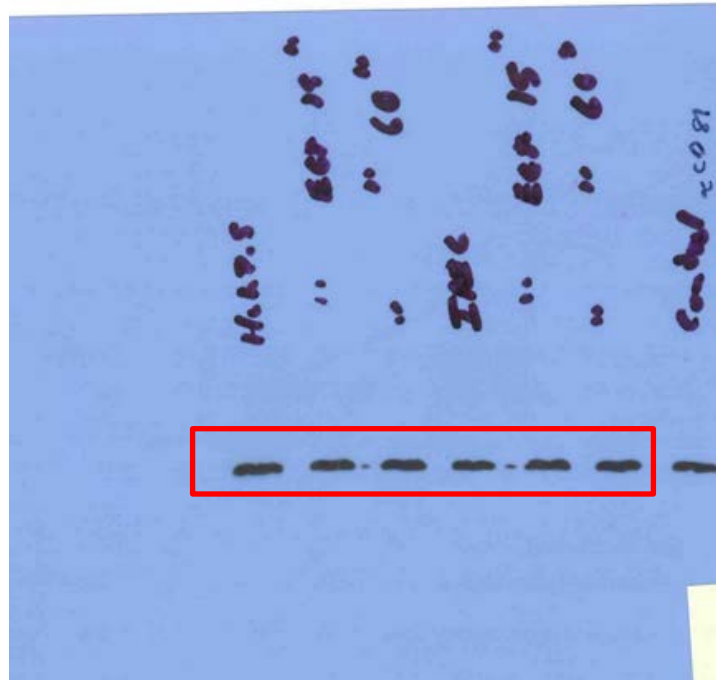

actin



**Supplemental Figure 1**

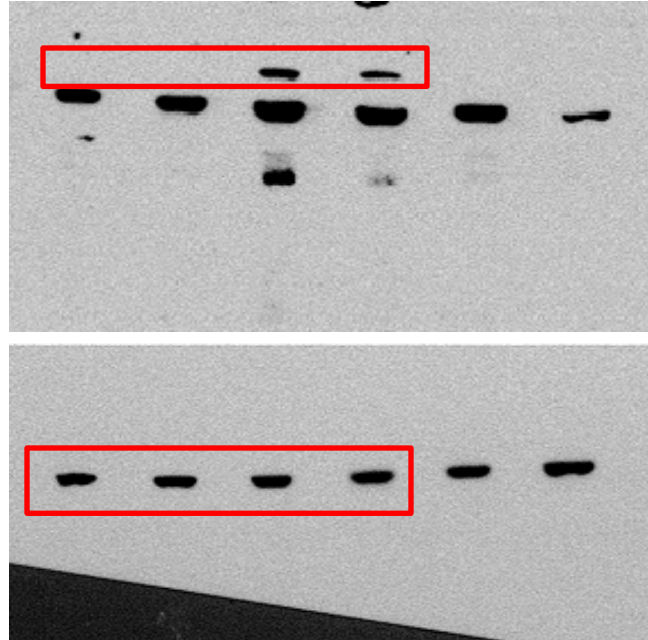

**NS3**

**actin**
