# Supplementary material for: Interferon-α inducible protein 6 impairs EGFR activation by CD81 and inhibits hepatitis C virus infection
Source: PubMed Central journal article supplement (PMC4355636; doi:10.1038/srep09012), 2015-03-11

INTERFERON- $\alpha$  INDUCIBLE PROTEIN 6 IMPAIRS EGFR ACTIVATION BY CD81 AND  
INHIBITS HEPATITIS C VIRUS INFECTION

Keith Meyer<sup>1</sup>, Young-Chan Kwon<sup>1</sup>, Shuanghu Liu<sup>2</sup>, Curt H. Hagedorn<sup>3</sup>, Ratna B. Ray<sup>4</sup>, and  
Ranjit Ray<sup>1,5\*</sup>

Departments of Internal Medicine<sup>1</sup>and Molecular Microbiology & Immunology, Saint Louis  
University<sup>5</sup>, Department of Medicinal Chemistry, College of Pharmacy, University of Utah<sup>2</sup>,  
Central Arkansas Veterans Healthcare System and University of Arkansas for Medical  
Sciences<sup>3</sup>, and Department of Pathology, Saint Louis University<sup>4</sup>

**Figure S1: Effect of IFI6 on HCV replicon expression.** Expression of IFI6 led to a modest reduction in relative replicon RNA levels, and standard deviations are shown as error bars (panel A). NS3 specific protein expression in Rep2a harboring cells is shown. Note that cropped gel images are used in this figure and the gels were run under the same experimental conditions (panel B).

**A**

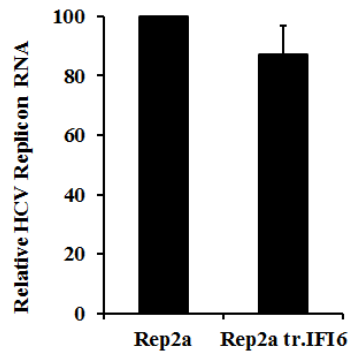

**B**

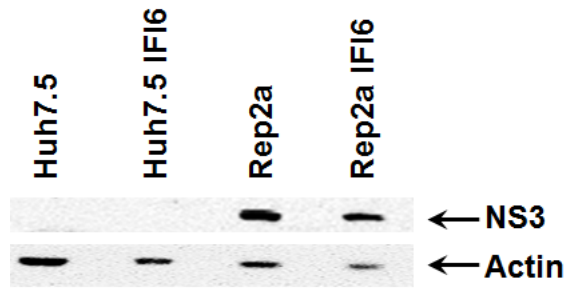

Supplement: srep09012-s2.pdf [file srep09012-s2.pdf]
